# Supplementary material for: Characterization of the gut mycobiome in patients with non-alcoholic fatty liver disease and correlations with serum metabolome
Source: Research Square preprint supplement (doi:10.21203/rs.3.rs-6630818/v1), 2025-06-23
Supplement: Supplementary file 1 [file 2872abf3036069efc1e13ad8.xlsx]

## Sheet: Table S1
Supplementary Table 1 | Sample and serum metabolites information from 90 NAFLD patients and 90 healthy controls.
Run	Source name	Factor value [gender]	SRA type	SRA name
SRR14509841	S1	Male	NAFLD	EU001
SRR14509843	S2	Female	NAFLD	EU002
SRR14509844	S3	Female	NAFLD	EU003
SRR14509845	S4	Male	NAFLD	EU004
SRR14509846	S6	Female	NAFLD	EU006
SRR14509717	S7	Male	NAFLD	EU007
SRR14509718	S8	Male	NAFLD	EU009
SRR14509847	S9	Female	NAFLD	EU010
SRR14509848	S10	Female	non-NAFLD	EU011
SRR14509849	S11	Female	non-NAFLD	EU012
SRR14509719	S12	Female	non-NAFLD	EU013
SRR14509785	S13	Male	NAFLD	EU014
SRR14509851	S14	Female	non-NAFLD	EU015
SRR14509852	S15	Male	NAFLD	EU016
SRR14509784	S16	Male	NAFLD	EU017
SRR14509853	S17	Male	NAFLD	EU018
SRR14509854	S18	Male	non-NAFLD	EU019
SRR14509720	S19	Male	NAFLD	EU020
SRR14509721	S20	Female	non-NAFLD	EU021
SRR14509855	S21	Male	non-NAFLD	EU022
SRR14509856	S22	Male	non-NAFLD	EU024
SRR14509857	S23	Male	NAFLD	EU025
SRR14509722	S24	Female	NAFLD	EU026
SRR14509790	S25	Female	NAFLD	EU028
SRR14509842	S26	Female	NAFLD	EU029
SRR14509724	S27	Female	NAFLD	EU030
SRR14509793	S28	Female	NAFLD	EU031
SRR14509794	S29	Male	non-NAFLD	EU032
SRR14509795	S30	Male	non-NAFLD	EU033
SRR14509725	S31	Female	non-NAFLD	EU034
SRR14509726	S32	Male	NAFLD	EU035
SRR14509850	S33	Male	NAFLD	EU036
SRR14509796	S34	Male	NAFLD	EU037
SRR14509797	S36	Female	NAFLD	EU039
SRR14509798	S37	Male	non-NAFLD	EU040
SRR14509723	S39	Female	non-NAFLD	EU042
SRR14509727	S40	Female	NAFLD	EU043
SRR14509729	S41	Female	NAFLD	EU044
SRR14509728	S42	Female	non-NAFLD	EU045
SRR14509799	S43	Female	non-NAFLD	EU046
SRR14509800	S44	Male	NAFLD	EU047
SRR14509801	S45	Female	NAFLD	EU049
SRR14509730	S46	Female	NAFLD	EU050
SRR14509731	S47	Female	non-NAFLD	EU051
SRR14509802	S48	Female	non-NAFLD	EU052
SRR14509803	S49	Male	non-NAFLD	EU053
SRR14509804	S50	Female	NAFLD	EU054
SRR14509732	S51	Female	non-NAFLD	EU055
SRR14509734	S52	Female	non-NAFLD	EU057
SRR14509733	S53	Male	non-NAFLD	EU058
SRR14509738	S54	Male	non-NAFLD	EU059
SRR14509805	S55	Female	NAFLD	EU060
SRR14509806	S56	Male	non-NAFLD	EU061
SRR14509807	S57	Female	NAFLD	EU062
SRR14509735	S58	Male	non-NAFLD	EU063
SRR14509736	S59	Female	NAFLD	EU064
SRR14509808	S60	Female	NAFLD	EU065
SRR14509858	S61	Male	NAFLD	EU066
SRR14509809	S62	Female	non-NAFLD	EU067
SRR14509746	S63	Male	non-NAFLD	EU068
SRR14509783	S64	Male	non-NAFLD	EU069
SRR14509810	S66	Female	NAFLD	EU072
SRR14509737	S67	Male	NAFLD	EU073
SRR14509739	S68	Female	non-NAFLD	EU074
SRR14509811	S69	Female	NAFLD	EU075
SRR14509872	S70	Female	NAFLD	EU076
SRR14509812	S72	Male	non-NAFLD	EU078
SRR14509813	S73	Female	non-NAFLD	EU079
SRR14509740	S74	Female	NAFLD	EU080
SRR14509741	S75	Female	non-NAFLD	EU081
SRR14509814	S76	Female	non-NAFLD	EU082
SRR14509861	S77	Female	non-NAFLD	EU083
SRR14509815	S78	Male	non-NAFLD	EU085
SRR14509816	S79	Male	non-NAFLD	EU086
SRR14509742	S80	Male	non-NAFLD	EU087
SRR14509859	S81	Female	NAFLD	EU088
SRR14509817	S82	Female	non-NAFLD	EU089
SRR14509818	S83	Female	NAFLD	EU090
SRR14509819	S84	Female	NAFLD	EU091
SRR14509743	S85	Male	non-NAFLD	EU093
SRR14509744	S86	Female	NAFLD	EU094
SRR14509820	S87	Female	non-NAFLD	EU095
SRR14509821	S88	Male	non-NAFLD	EU096
SRR14509822	S89	Female	NAFLD	EU097
SRR14509745	S90	Male	non-NAFLD	EU098
SRR14509747	S91	Female	non-NAFLD	EU099
SRR14509823	S92	Female	non-NAFLD	EU100
SRR14509824	S93	Male	non-NAFLD	EU101
SRR14509825	S94	Female	non-NAFLD	EU102
SRR14509748	S95	Male	non-NAFLD	EU103
SRR14509749	S96	Male	NAFLD	EU104
SRR14509834	S97	Male	NAFLD	EU105
SRR14509750	S99	Female	non-NAFLD	EU107
SRR14509751	S100	Female	NAFLD	EU108
SRR14509752	S101	Male	non-NAFLD	EU109
SRR14509753	S102	Female	non-NAFLD	EU110
SRR14509782	S103	Male	non-NAFLD	EU111
SRR14509881	S104	Female	non-NAFLD	EU112
SRR14509880	S106	Female	non-NAFLD	EU115
SRR14509879	S107	Male	non-NAFLD	EU116
SRR14509878	S108	Female	non-NAFLD	EU117
SRR14509877	S109	Female	non-NAFLD	EU118
SRR14509876	S110	Female	non-NAFLD	EU120
SRR14509875	S112	Female	NAFLD	EU121
SRR14509874	S113	Male	non-NAFLD	EU122
SRR14509873	S114	Male	NAFLD	EU123
SRR14509871	S115	Male	NAFLD	EU124
SRR14509870	S116	Male	NAFLD	EU125
SRR14509869	S117	Female	non-NAFLD	EU126
SRR14509836	S118	Male	non-NAFLD	EU127
SRR14509868	S119	Female	NAFLD	EU128
SRR14509867	S120	Female	non-NAFLD	EU129
SRR14509866	S121	Female	non-NAFLD	EU130
SRR14509709	S122	Male	non-NAFLD	EU131
SRR14509865	S123	Male	NAFLD	EU133
SRR14509864	S124	Female	NAFLD	EU134
SRR14509863	S125	Female	NAFLD	EU135
SRR14509862	S126	Male	non-NAFLD	EU136
SRR14509860	S127	Male	NAFLD	EU138
SRR14509713	S128	Female	NAFLD	EU139
SRR14509826	S129	Male	non-NAFLD	EU140
SRR14509827	S130	Female	non-NAFLD	EU141
SRR14509828	S131	Female	NAFLD	EU142
SRR14509829	S132	Male	NAFLD	EU143
SRR14509830	S133	Male	NAFLD	EU144
SRR14509831	S134	Female	NAFLD	EU145
SRR14509832	S136	Female	non-NAFLD	EU146
SRR14509833	S137	Female	NAFLD	EU147
SRR14509754	S138	Female	NAFLD	EU148
SRR14509835	S139	Male	non-NAFLD	EU149
SRR14509755	S140	Male	NAFLD	EU150
SRR14509756	S141	Female	non-NAFLD	EU151
SRR14509757	S142	Female	NAFLD	EU152
SRR14509758	S143	Male	NAFLD	EU153
SRR14509759	S144	Male	non-NAFLD	EU154
SRR14509760	S145	Female	non-NAFLD	EU155
SRR14509761	S146	Female	NAFLD	EU156
SRR14509762	S147	Male	NAFLD	EU157
SRR14509763	S148	Female	NAFLD	EU158
SRR14509837	S149	Female	NAFLD	EU159
SRR14509764	S150	Male	non-NAFLD	EU160
SRR14509765	S151	Female	NAFLD	EU161
SRR14509766	S152	Male	NAFLD	EU162
SRR14509706	S155	Female	non-NAFLD	EU165
SRR14509707	S156	Male	NAFLD	EU166
SRR14509767	S157	Female	non-NAFLD	EU167
SRR14509768	S158	Male	NAFLD	EU168
SRR14509769	S159	Male	non-NAFLD	EU169
SRR14509708	S160	Female	non-NAFLD	EU170
SRR14509710	S161	Male	NAFLD	EU172
SRR14509770	S162	Female	NAFLD	EU173
SRR14509771	S163	Male	NAFLD	EU174
SRR14509772	S164	Female	non-NAFLD	EU175
SRR14509711	S165	Female	non-NAFLD	EU176
SRR14509712	S166	Male	NAFLD	EU177
SRR14509773	S167	Female	non-NAFLD	EU178
SRR14509774	S168	Female	non-NAFLD	EU179
SRR14509775	S169	Female	NAFLD	EU180
SRR14509776	S170	Female	NAFLD	EU181
SRR14509792	S171	Female	non-NAFLD	EU182
SRR14509714	S172	Female	non-NAFLD	EU183
SRR14509777	S173	Female	non-NAFLD	EU184
SRR14509778	S174	Female	non-NAFLD	EU185
SRR14509779	S175	Male	NAFLD	EU186
SRR14509780	S176	Female	NAFLD	EU187
SRR14509781	S177	Male	NAFLD	EU188
SRR14509786	S178	Female	NAFLD	EU189
SRR14509787	S179	Female	NAFLD	EU191
SRR14509788	S180	Female	NAFLD	EU192
SRR14509789	S181	Male	non-NAFLD	EU193
SRR14509791	S182	Male	non-NAFLD	EU194
SRR14509838	S183	Male	non-NAFLD	EU195
SRR14509839	S185	Female	non-NAFLD	EU199
SRR14509840	S186	Male	non-NAFLD	EU200
SRR14509715	S187	Female	non-NAFLD	EU201
SRR14509716	S188	Female	non-NAFLD	EU202
	S65	Female	NAFLD
	S71	Female	NAFLD
	S111	Male	NAFLD
	S135	Male	NAFLD
